# Supplementary material for: Enhancement of intramolecular charge transfer strength in diphenylamine substituted symmetric 1,3,4-oxadiazole derivatives
Source: Royal Society of Chemistry journal article supplement (doi:10.1039/c8ra08439d), 2018-12-19
Supplement: c8ra08439d1.pdf [file c8ra08439d1.pdf]

## Supporting Information

# Enhancement of Intramolecular Charge Transfer Strength in Diphenylamine Substituted Symmetric 1,3,4-Oxadiazole Derivatives

Fangyi Chen,<sup>a</sup> Wanxi Zhang,<sup>a</sup> Zijian Liu,<sup>a</sup> Lingyan Meng,<sup>a</sup> Binglian Bai,<sup>b</sup> Haitao Wang,<sup>a,\*</sup> and Min Li<sup>a,\*</sup>

<sup>a</sup> Key Laboratory of Automobile Materials (MOE) & College of Materials Science and Engineering, Jilin University, Changchun 130012, China

<sup>b</sup> College of Physics, Jilin University, Changchun 130012, China

\*Corresponding author

*E-mail: haitao\_wang@jlu.edu.cn, minli@jlu.edu.cn*

## Contents

**Figure S1** Normalized UV–vis absorption and fluorescence emission spectra of BOXD-*p*-OCH<sub>3</sub>. (**Page 2**)

**Figure S2** Normalized excitation spectra of DPAOXD. (**Page 2**)

**Figure S3** Normalized excitation spectra of DPAOXDBEN. (**Page 3**)

**Figure S4** Optimized molecular structures in the first excited state of DPAOXD and DPAOXDBEN. (**Page 3**)

**Figure S5** Calculated absorption spectrum of DPAOXD in CHEX. (**Page 4**)

**Figure S6** Calculated absorption spectrum of DPAOXDBEN in CHEX. (**Page 4**)

**Figure S7** Molecular structure of (a) DPAOXD and (b) DPAOXDBEN. (**Page 5**)

**Table S1** Calculated bond length of optimized structure of DPAOXD in the ground state and first excited state. (**Page 5**)

**Table S2** Calculated angles of optimized structure of DPAOXD in the ground state and first excited state. (**Page 6**)

**Table S3** Calculated torsions of optimized structure of DPAOXD in the ground state and first excited state. (**Page 7**)

**Table S4** Calculated bond length of optimized structure of DPAOXDBEN in the ground state and first excited state. (**Page 8**)

**Table S5** Calculated angles of optimized structure of DPAOXDBEN in the ground state and first excited state. (**Page 9**)

**Table S6** Calculated torsion of optimized structure of DPAOXDBEN in the ground state and first excited state. (**Page 10**)

**Table S7** Orbital energy of DPAOXD and DPAOXDBEN. (**Page 12**)

**Table S8** Calculated atomic charge of different fragment in these compounds investigated. (**Page 12**)

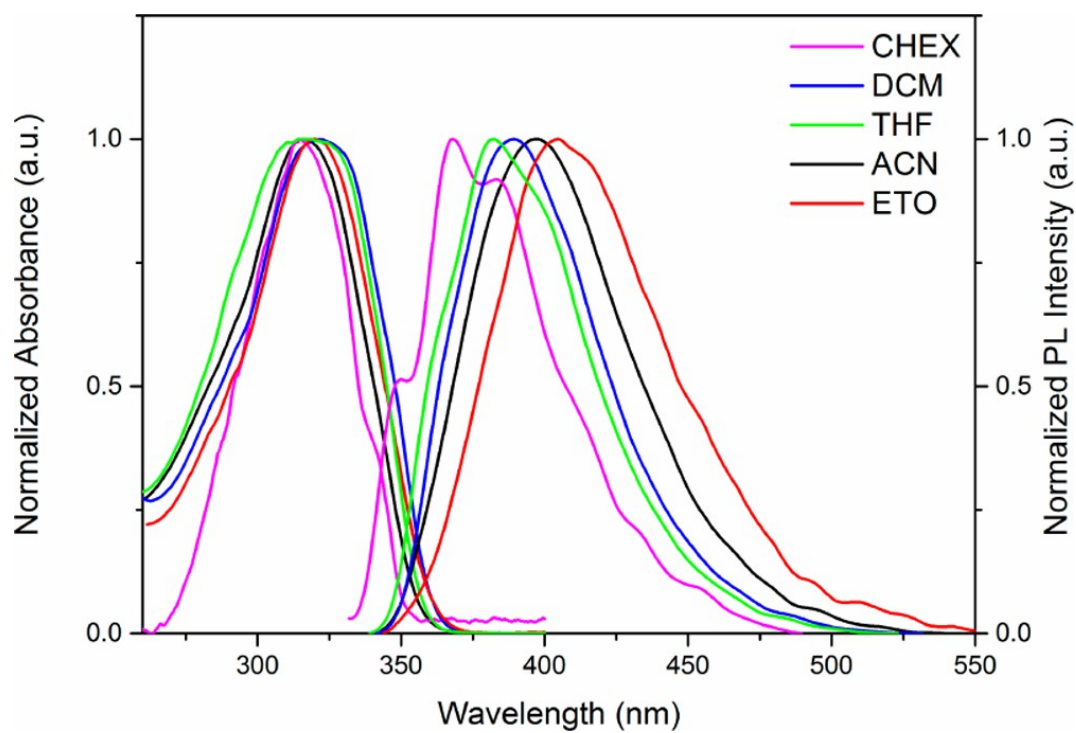

Figure S1 Normalized UV-vis absorption and fluorescence emission spectra of BOXD-*p*-OCH<sub>3</sub>

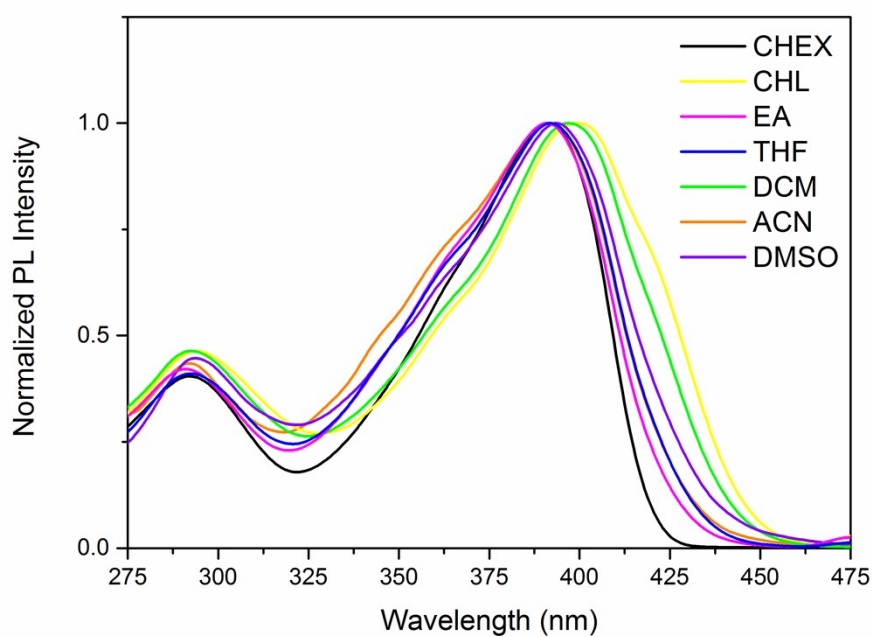

Figure S2 Normalized excitation spectra of DPAOXD

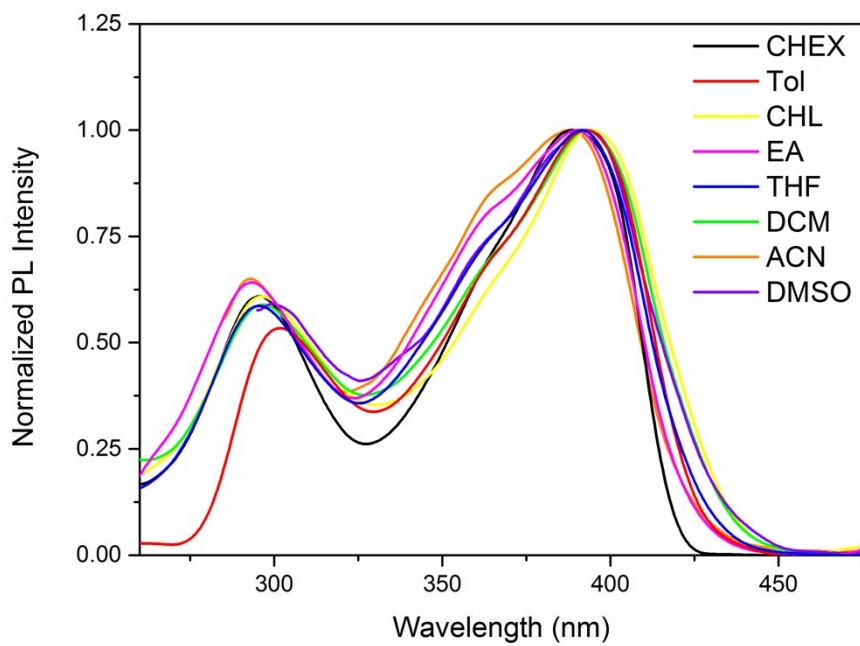

Figure S3 Normalized excitation spectra of DPAOXDBEN

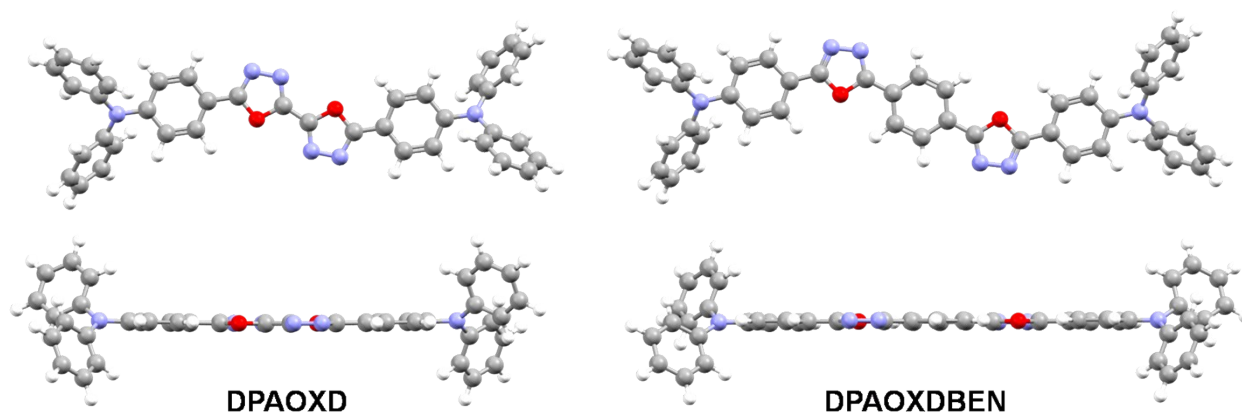

Figure S6 Optimized molecular structures in the first excited state of DPAOXD and DPAOXDBEN

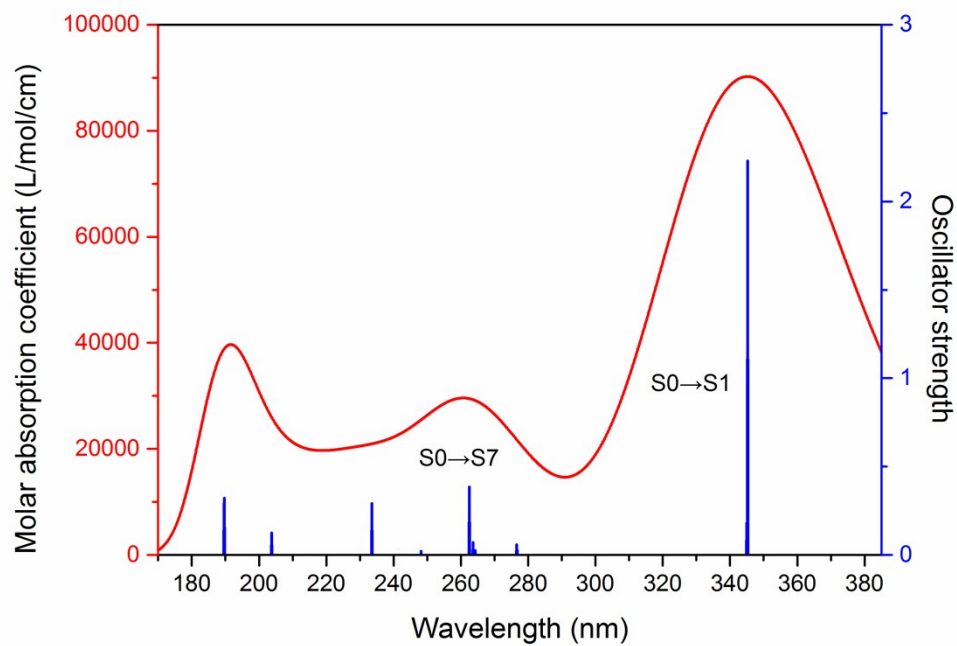

Figure S4 Calculated absorption spectrum of DPAOXD in CHEX

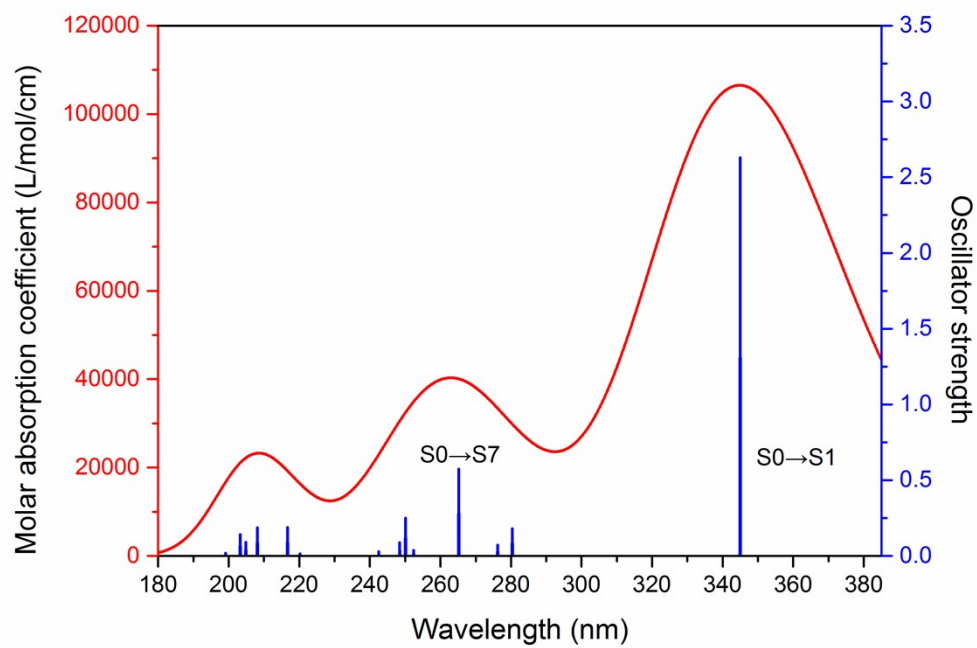

Figure S5 Calculated absorption spectrum of DPAOXDBEN in CHEX

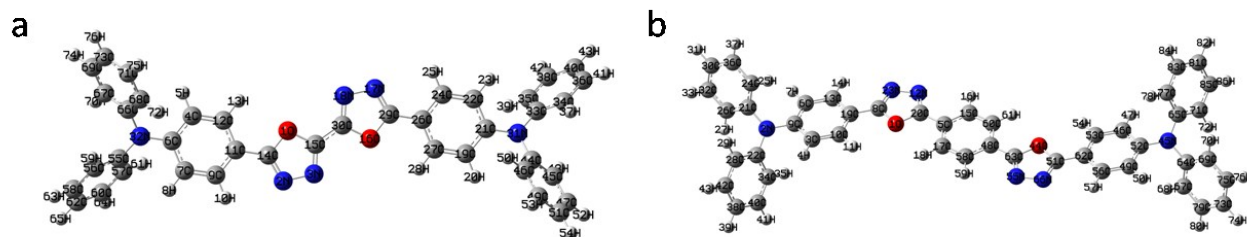

Figure S7 Molecular structure of (a) DPAOXD and (b) DPAOXDBEN

Table S1 Calculated bond length of optimized structure of DPAOXD in the ground state and first excited state

| Bond |     | S <sub>0</sub> | S <sub>1</sub> | variation |
|------|-----|----------------|----------------|-----------|
| O1   | C14 | 1.3585         | 1.3659         | 0.0074    |
| O1   | C15 | 1.3512         | 1.364          | 0.0128    |
| N2   | N3  | 1.3804         | 1.3388         | -0.0416   |
| N2   | C14 | 1.2978         | 1.3239         | 0.0261    |
| N3   | C15 | 1.2909         | 1.328          | 0.0371    |
| C4   | C6  | 1.402          | 1.4098         | 0.0078    |
| C4   | C12 | 1.3828         | 1.3747         | -0.0081   |
| C6   | C7  | 1.4036         | 1.4126         | 0.009     |
| C6   | N32 | 1.4027         | 1.3999         | -0.0028   |
| C7   | C9  | 1.3809         | 1.372          | -0.0089   |
| C9   | C11 | 1.3977         | 1.4144         | 0.0167    |
| C11  | C12 | 1.3962         | 1.4128         | 0.0166    |
| C11  | C14 | 1.4513         | 1.4201         | -0.0312   |
| C15  | C30 | 1.4445         | 1.4034         | -0.0411   |
| C55  | C56 | 1.3955         | 1.3982         | 0.0027    |
| C55  | C57 | 1.3961         | 1.3983         | 0.0022    |
| C56  | C58 | 1.3884         | 1.3869         | -0.0015   |
| C57  | C60 | 1.3883         | 1.3871         | -0.0012   |
| C58  | C62 | 1.3902         | 1.3913         | 0.0011    |
| C60  | C62 | 1.3907         | 1.391          | 0.0003    |
| C66  | C67 | 1.3954         | 1.3981         | 0.0027    |
| C66  | C68 | 1.3961         | 1.3983         | 0.0022    |
| C67  | C69 | 1.3885         | 1.3869         | -0.0016   |
| C68  | C71 | 1.3883         | 1.3872         | -0.0011   |
| C69  | C73 | 1.3903         | 1.3914         | 0.0011    |
| C71  | C73 | 1.3905         | 1.391          | 0.0005    |

Table S2 Calculated angles of optimized structure of DPAOXD in the ground state and first excited state

|     | angle |     | S0     | S1     | variation |
|-----|-------|-----|--------|--------|-----------|
| C14 | O1    | C15 | 102.39 | 102.38 | -0.01     |
| N3  | N2    | C14 | 106.81 | 107.87 | 1.06      |
| N2  | N3    | C15 | 106.01 | 106.72 | 0.71      |
| C6  | C4    | C12 | 120.66 | 120.69 | 0.03      |
| C4  | C6    | C7  | 118.54 | 118.74 | 0.2       |
| C4  | C6    | N32 | 120.74 | 120.68 | -0.06     |
| C7  | C6    | N32 | 120.72 | 120.58 | -0.14     |
| C6  | C7    | H8  | 119.56 | 119.3  | -0.26     |
| C6  | C7    | C9  | 120.66 | 120.67 | 0.01      |
| C7  | C9    | C11 | 120.54 | 120.67 | 0.13      |
| C9  | C11   | C12 | 119.08 | 118.61 | -0.47     |
| C9  | C11   | C14 | 119.55 | 120.02 | 0.47      |
| C12 | C11   | C14 | 121.37 | 121.37 | 0         |
| C4  | C12   | C11 | 120.53 | 120.62 | 0.09      |
| O1  | C14   | N2  | 111.83 | 111.22 | -0.61     |
| O1  | C14   | C11 | 119.33 | 120.44 | 1.11      |
| N2  | C14   | C11 | 128.84 | 128.34 | -0.5      |
| O1  | C15   | N3  | 112.96 | 111.8  | -1.16     |
| O1  | C15   | C30 | 118.64 | 119.85 | 1.21      |
| N3  | C15   | C30 | 128.4  | 128.35 | -0.05     |
| C6  | N32   | C55 | 120.77 | 120.27 | -0.5      |
| C6  | N32   | C66 | 120.76 | 120.37 | -0.39     |
| C55 | N32   | C66 | 118.47 | 119.35 | 0.88      |
| N32 | C55   | C56 | 120.04 | 120.29 | 0.25      |
| N32 | C55   | C57 | 120.58 | 120.26 | -0.32     |
| C56 | C55   | C57 | 119.37 | 119.45 | 0.08      |
| C55 | C56   | C58 | 120.15 | 120.02 | -0.13     |
| C55 | C57   | C60 | 120.12 | 120.03 | -0.09     |
| C56 | C58   | C62 | 120.46 | 120.53 | 0.07      |
| C57 | C60   | C62 | 120.46 | 120.51 | 0.05      |
| C58 | C62   | C60 | 119.43 | 119.46 | 0.03      |
| N32 | C66   | C67 | 120.05 | 120.27 | 0.22      |
| N32 | C66   | C68 | 120.58 | 120.27 | -0.31     |
| C67 | C66   | C68 | 119.37 | 119.46 | 0.09      |
| C66 | C67   | C69 | 120.15 | 120.03 | -0.12     |
| C66 | C68   | C71 | 120.12 | 120.02 | -0.1      |
| C67 | C69   | C73 | 120.44 | 120.52 | 0.08      |
| C68 | C71   | C73 | 120.46 | 120.52 | 0.06      |
| C69 | C73   | C71 | 119.44 | 119.46 | 0.02      |

Table S3 Calculated torsions of optimized structure of DPAOXD in the ground state and first excited state

| Torsion |     |     |     | S <sub>0</sub> | S <sub>1</sub> | variation |
|---------|-----|-----|-----|----------------|----------------|-----------|
| C15     | O1  | C14 | N2  | -0.04          | 0.14           | 0.18      |
| C15     | O1  | C14 | C11 | 179.86         | -179.56        | -359.42   |
| C14     | O1  | C15 | N3  | 0              | -0.15          | -0.15     |
| C14     | O1  | C15 | C30 | -179.76        | 179.58         | 359.34    |
| C14     | N2  | N3  | C15 | -0.06          | -0.01          | 0.05      |
| N3      | N2  | C14 | O1  | 0.06           | -0.09          | -0.15     |
| N3      | N2  | C14 | C11 | -179.83        | 179.58         | 359.41    |
| N2      | N3  | C15 | O1  | 0.03           | 0.1            | 0.07      |
| N2      | N3  | C15 | C30 | 179.76         | -179.6         | -359.36   |
| C12     | C4  | C6  | C7  | -0.34          | 0.12           | 0.46      |
| C12     | C4  | C6  | N32 | 179.57         | -179.78        | -359.35   |
| C6      | C4  | C12 | C11 | 0.6            | 0.14           | -0.46     |
| C4      | C6  | C7  | C9  | -0.24          | -0.23          | 0.01      |
| N32     | C6  | C7  | C9  | 179.85         | 179.67         | -0.18     |
| C4      | C6  | N32 | C55 | 150.04         | 143.88         | -6.16     |
| C4      | C6  | N32 | C66 | -30.2          | -35.46         | -5.26     |
| C7      | C6  | N32 | C55 | -30.05         | -36.02         | -5.97     |
| C7      | C6  | N32 | C66 | 149.71         | 144.64         | -5.07     |
| C6      | C7  | C9  | C11 | 0.55           | 0.08           | -0.47     |
| C7      | C9  | C11 | C12 | -0.29          | 0.17           | 0.46      |
| C7      | C9  | C11 | C14 | 179.64         | -179.58        | -359.22   |
| C9      | C11 | C12 | C4  | -0.29          | -0.28          | 0.01      |
| C14     | C11 | C12 | C4  | 179.79         | 179.46         | -0.33     |
| C9      | C11 | C14 | O1  | -177.97        | 179.92         | 357.89    |
| C9      | C11 | C14 | N2  | 1.91           | 0.27           | -1.64     |
| C12     | C11 | C14 | O1  | 1.95           | 0.17           | -1.78     |
| C12     | C11 | C14 | N2  | -178.16        | -179.47        | -1.31     |
| O1      | C15 | C30 | O16 | -179.77        | -179.25        | 0.52      |
| O1      | C15 | C30 | N18 | 0.5            | 0.43           | -0.07     |
| N3      | C15 | C30 | O16 | 0.51           | 0.43           | -0.08     |
| N3      | C15 | C30 | N18 | -179.21        | -179.89        | -0.68     |
| C6      | N32 | C55 | C56 | 133.37         | 138.28         | 4.91      |
| C6      | N32 | C55 | C57 | -47.53         | -41.65         | 5.88      |
| C66     | N32 | C55 | C56 | -46.39         | -42.37         | 4.02      |
| C66     | N32 | C55 | C57 | 132.7          | 137.7          | 5         |
| C6      | N32 | C66 | C67 | 133.61         | 137.48         | 3.87      |
| C6      | N32 | C66 | C68 | -47.33         | -42.43         | 4.9       |
| C55     | N32 | C66 | C67 | -46.63         | -41.86         | 4.77      |
| C55     | N32 | C66 | C68 | 132.43         | 138.22         | 5.79      |
| N31     | C33 | C34 | C36 | 178.94         | 179.81         | 0.87      |

|     |     |     |     |         |        |        |
|-----|-----|-----|-----|---------|--------|--------|
| N32 | C55 | C56 | C58 | 178.94  | 179.81 | 0.87   |
| C57 | C55 | C56 | C58 | -0.17   | -0.26  | -0.09  |
| N32 | C55 | C57 | C60 | -179.85 | 179.61 | 359.46 |
| C56 | C55 | C57 | C60 | -0.74   | -0.32  | 0.42   |
| C55 | C56 | C58 | C62 | 0.81    | 0.6    | -0.21  |
| C55 | C57 | C60 | C62 | 1.03    | 0.57   | -0.46  |
| C56 | C58 | C62 | C60 | -0.53   | -0.35  | 0.18   |
| C57 | C60 | C62 | C58 | -0.39   | -0.24  | 0.15   |
| N32 | C66 | C67 | C69 | 178.89  | 179.8  | 0.91   |
| C68 | C66 | C67 | C69 | -0.18   | -0.28  | -0.1   |
| N32 | C66 | C68 | C71 | -179.81 | 179.63 | 359.44 |
| C67 | C66 | C68 | C71 | -0.74   | -0.28  | 0.46   |
| C66 | C67 | C69 | C73 | 0.81    | 0.6    | -0.21  |
| C66 | C68 | C71 | C73 | 1.03    | 0.54   | -0.49  |
| C67 | C69 | C73 | C71 | -0.53   | -0.35  | 0.18   |
| C68 | C71 | C73 | C69 | -0.39   | -0.23  | 0.16   |

Table S4 Calculated bond length of optimized structure of DPAOXDBEN in the ground state and first excited state

| Bond |     | S <sub>0</sub> | S <sub>1</sub> | variation |
|------|-----|----------------|----------------|-----------|
| O1   | C8  | 1.3593         | 1.3625         | 0.0032    |
| O1   | C20 | 1.3588         | 1.3684         | 0.0096    |
| N2   | C9  | 1.4045         | 1.399          | -0.0055   |
| N2   | C21 | 1.4217         | 1.4202         | -0.0015   |
| N2   | C22 | 1.4215         | 1.4199         | -0.0016   |
| C3   | C9  | 1.4012         | 1.4079         | 0.0067    |
| C3   | C10 | 1.3835         | 1.3765         | -0.007    |
| C5   | C15 | 1.3968         | 1.4199         | 0.0231    |
| C5   | C17 | 1.397          | 1.4195         | 0.0225    |
| C5   | C20 | 1.4567         | 1.4154         | -0.0413   |
| C6   | C9  | 1.4029         | 1.4107         | 0.0078    |
| C6   | C13 | 1.3813         | 1.3739         | -0.0074   |
| C8   | C19 | 1.453          | 1.4259         | -0.0271   |
| C8   | N23 | 1.2951         | 1.3182         | 0.0231    |
| C10  | C19 | 1.3956         | 1.4086         | 0.013     |
| N12  | C20 | 1.2924         | 1.3252         | 0.0328    |
| N12  | N23 | 1.3812         | 1.3434         | -0.0378   |
| C13  | C19 | 1.3976         | 1.4107         | 0.0131    |
| C15  | C60 | 1.3835         | 1.368          | -0.0155   |
| C17  | C58 | 1.3835         | 1.368          | -0.0155   |
| C21  | C24 | 1.3963         | 1.3973         | 0.001     |
| C21  | C26 | 1.3958         | 1.3971         | 0.0013    |
| C22  | C28 | 1.3959         | 1.3971         | 0.0012    |



|     |     |        |        |         |
|-----|-----|--------|--------|---------|
| C22 | C34 | 1.3963 | 1.3974 | 0.0011  |
| C24 | C36 | 1.3883 | 1.3876 | -0.0007 |
| C26 | C32 | 1.3883 | 1.3875 | -0.0008 |
| C28 | C42 | 1.3883 | 1.3874 | -0.0009 |
| C30 | C32 | 1.3904 | 1.391  | 0.0006  |
| C30 | C36 | 1.3905 | 1.3909 | 0.0004  |
| C34 | C40 | 1.3883 | 1.3875 | -0.0008 |
| C38 | C40 | 1.3905 | 1.391  | 0.0005  |
| C38 | C42 | 1.3903 | 1.391  | 0.0007  |
| C48 | C58 | 1.3968 | 1.4199 | 0.0231  |
| C48 | C60 | 1.397  | 1.4195 | 0.0225  |
| C48 | C63 | 1.4567 | 1.4154 | -0.0413 |
| C56 | C62 | 1.3976 | 1.4107 | 0.0131  |

Table S5 Calculated angles of optimized structure of DPAOXDBEN in the ground state and first excited state

| Angle |     |     | S <sub>0</sub> | S <sub>1</sub> | variation |
|-------|-----|-----|----------------|----------------|-----------|
| C8    | O1  | C20 | 102.9          | 103.08         | 0.18      |
| C9    | N2  | C21 | 120.61         | 120.53         | -0.08     |
| C9    | N2  | C22 | 120.67         | 120.54         | -0.13     |
| C21   | N2  | C22 | 118.72         | 118.93         | 0.21      |
| C9    | C3  | C10 | 120.62         | 120.71         | 0.09      |
| C15   | C5  | C17 | 119.83         | 118.89         | -0.94     |
| C15   | C5  | C20 | 119.07         | 119.53         | 0.46      |
| C17   | C5  | C20 | 121.1          | 121.57         | 0.47      |
| C9    | C6  | C13 | 120.67         | 120.7          | 0.03      |
| O1    | C8  | C19 | 119.58         | 120.62         | 1.04      |
| O1    | C8  | N23 | 111.76         | 111.17         | -0.59     |
| C19   | C8  | N23 | 128.66         | 128.21         | -0.45     |
| N2    | C9  | C3  | 120.75         | 120.72         | -0.03     |
| N2    | C9  | C6  | 120.72         | 120.69         | -0.03     |
| C3    | C9  | C6  | 118.53         | 118.59         | 0.06      |
| C3    | C10 | C19 | 120.62         | 120.72         | 0.1       |
| C20   | N12 | N23 | 106.74         | 107.4          | 0.66      |
| C6    | C13 | C19 | 120.59         | 120.73         | 0.14      |
| C5    | C15 | C60 | 120.04         | 120.53         | 0.49      |
| C5    | C17 | C58 | 120.12         | 120.57         | 0.45      |
| C8    | C19 | C10 | 121.58         | 121.59         | 0.01      |
| C8    | C19 | C13 | 119.46         | 119.86         | 0.4       |
| C10   | C19 | C13 | 118.96         | 118.55         | -0.41     |
| O1    | C20 | C5  | 119.64         | 120.75         | 1.11      |
| O1    | C20 | N12 | 111.9          | 110.75         | -1.15     |
| C5    | C20 | N12 | 128.46         | 128.51         | 0.05      |
| N2    | C21 | C24 | 120.55         | 120.37         | -0.18     |

|     |     |     |        |        |       |
|-----|-----|-----|--------|--------|-------|
| N2  | C21 | C26 | 120.11 | 120.15 | 0.04  |
| C24 | C21 | C26 | 119.33 | 119.48 | 0.15  |
| N2  | C22 | C28 | 120.12 | 120.17 | 0.05  |
| N2  | C22 | C34 | 120.57 | 120.38 | -0.19 |
| C28 | C22 | C34 | 119.3  | 119.45 | 0.15  |
| C8  | N23 | N12 | 106.7  | 107.61 | 0.91  |
| C21 | C24 | C36 | 120.14 | 120.03 | -0.11 |
| C21 | C26 | C32 | 120.17 | 120.04 | -0.13 |
| C22 | C28 | C42 | 120.17 | 120.05 | -0.12 |
| C32 | C30 | C36 | 119.42 | 119.47 | 0.05  |
| C26 | C32 | C30 | 120.46 | 120.49 | 0.03  |
| C22 | C34 | C40 | 120.16 | 120.05 | -0.11 |
| C24 | C36 | C30 | 120.47 | 120.49 | 0.02  |
| C40 | C38 | C42 | 119.39 | 119.46 | 0.07  |
| C34 | C40 | C38 | 120.48 | 120.48 | 0     |
| C28 | C42 | C38 | 120.48 | 120.5  | 0.02  |
| C58 | C48 | C60 | 119.83 | 118.89 | -0.94 |
| C58 | C48 | C63 | 119.07 | 119.53 | 0.46  |
| C60 | C48 | C63 | 121.1  | 121.57 | 0.47  |
| C49 | C56 | C62 | 120.59 | 120.73 | 0.14  |
| C17 | C58 | C48 | 120.04 | 120.53 | 0.49  |
| C15 | C60 | C48 | 120.12 | 120.57 | 0.45  |

Table S6 Calculated torsion of optimized structure of DPAOXDBEN in the ground state and first excited state

| Torsion |    |     |     | S <sub>0</sub> | S <sub>1</sub> | variation |
|---------|----|-----|-----|----------------|----------------|-----------|
| C20     | O1 | C8  | C19 | 179.92         | 179.97         | 0.05      |
| C20     | O1 | C8  | N23 | -0.03          | 0              | 0.03      |
| C8      | O1 | C20 | C5  | -179.96        | -179.98        | -0.02     |
| C8      | O1 | C20 | N12 | -0.01          | -0.02          | -0.01     |
| C21     | N2 | C9  | C3  | 148.28         | 146.91         | -1.37     |
| C21     | N2 | C9  | C6  | -31.76         | -33.13         | -1.37     |
| C22     | N2 | C9  | C3  | -31.84         | -33.09         | -1.25     |
| C22     | N2 | C9  | C6  | 148.12         | 146.86         | -1.26     |
| C9      | N2 | C21 | C24 | -46.72         | -44.15         | 2.57      |
| C9      | N2 | C21 | C26 | 134.03         | 136.16         | 2.13      |
| C22     | N2 | C21 | C24 | 133.4          | 135.86         | 2.46      |
| C22     | N2 | C21 | C26 | -45.86         | -43.84         | 2.02      |
| C9      | N2 | C22 | C28 | 134.44         | 136.03         | 1.59      |
| C9      | N2 | C22 | C34 | -46.37         | -44.32         | 2.05      |
| C21     | N2 | C22 | C28 | -45.68         | -43.97         | 1.71      |
| C21     | N2 | C22 | C34 | 133.51         | 135.68         | 2.17      |
| C10     | C3 | C9  | N2  | 179.59         | 179.78         | 0.19      |

|     |     |     |     |         |         |         |
|-----|-----|-----|-----|---------|---------|---------|
| C10 | C3  | C9  | C6  | -0.36   | -0.18   | 0.18    |
| C9  | C3  | C10 | H11 | 179.76  | 179.33  | -0.43   |
| C9  | C3  | C10 | C19 | 0.63    | 0.26    | -0.37   |
| C17 | C5  | C15 | C60 | 0.01    | 0       | -0.01   |
| C20 | C5  | C15 | C60 | -179.99 | 179.98  | 359.97  |
| C15 | C5  | C17 | C58 | -0.01   | 0       | 0.01    |
| C20 | C5  | C17 | C58 | 179.99  | -179.98 | -359.97 |
| C15 | C5  | C20 | O1  | 179.94  | 179.99  | 0.05    |
| C15 | C5  | C20 | N12 | -0.01   | 0.03    | 0.04    |
| C17 | C5  | C20 | O1  | -0.05   | -0.03   | 0.02    |
| C17 | C5  | C20 | N12 | 180     | -179.99 | -359.99 |
| C13 | C6  | C9  | N2  | 179.82  | -179.99 | -359.81 |
| C13 | C6  | C9  | C3  | -0.23   | -0.03   | 0.2     |
| C9  | C6  | C13 | C19 | 0.56    | 0.17    | -0.39   |
| O1  | C8  | C19 | C10 | 1.07    | 0.46    | -0.61   |
| O1  | C8  | C19 | C13 | -178.87 | -179.5  | -0.63   |
| N23 | C8  | C19 | C10 | -178.99 | -179.58 | -0.59   |
| N23 | C8  | C19 | C13 | 1.07    | 0.46    | -0.61   |
| O1  | C8  | N23 | N12 | 0.06    | 0.02    | -0.04   |
| C19 | C8  | N23 | N12 | -179.89 | -179.95 | -0.06   |
| C3  | C10 | C19 | C8  | 179.76  | 179.91  | 0.15    |
| C3  | C10 | C19 | C13 | -0.3    | -0.12   | 0.18    |
| N23 | N12 | C20 | O1  | 0.04    | 0.03    | -0.01   |
| N23 | N12 | C20 | C5  | 179.99  | 179.99  | 0       |
| C20 | N12 | N23 | C8  | -0.06   | -0.03   | 0.03    |
| C6  | C13 | C19 | C8  | 179.65  | 179.87  | 0.22    |
| C6  | C13 | C19 | C10 | -0.3    | -0.09   | 0.21    |
| C5  | C15 | C60 | C48 | -0.01   | 0       | 0.01    |
| C5  | C17 | C58 | C48 | 0.01    | 0       | -0.01   |
| N2  | C21 | C24 | C36 | -179.98 | 179.82  | 359.8   |
| C26 | C21 | C24 | C36 | -0.72   | -0.48   | 0.24    |
| N2  | C21 | C26 | C32 | 179.05  | 179.51  | 0.46    |
| C24 | C21 | C26 | C32 | -0.21   | -0.19   | 0.02    |
| N2  | C22 | C28 | C42 | 178.99  | 179.48  | 0.49    |
| C34 | C22 | C28 | C42 | -0.21   | -0.17   | 0.04    |
| N2  | C22 | C34 | C40 | -179.9  | 179.87  | 359.77  |
| C28 | C22 | C34 | C40 | -0.71   | -0.48   | 0.23    |
| C21 | C24 | C36 | C30 | 1.04    | 0.73    | -0.31   |
| C21 | C26 | C32 | C30 | 0.83    | 0.63    | -0.2    |
| C22 | C28 | C42 | C38 | 0.82    | 0.62    | -0.2    |
| C36 | C30 | C32 | C26 | -0.51   | -0.39   | 0.12    |
| C32 | C30 | C36 | C24 | -0.43   | -0.29   | 0.14    |

|     |     |     |     |       |       |       |
|-----|-----|-----|-----|-------|-------|-------|
| C22 | C34 | C40 | C38 | 1.01  | 0.69  | -0.32 |
| C42 | C38 | C40 | C34 | -0.4  | -0.25 | 0.15  |
| C40 | C38 | C42 | C28 | -0.52 | -0.41 | 0.11  |

Table S7 Orbital energy of DPAOXD and DPAOXDBEN (eV)

|               | H-2   | H-1   | H     | L     | L+1   | L+5  | L+6  | $\Delta E_{H-1-L+1}$ | $\Delta E_{H-L}$ | $\Delta E_{H-1-L+5}$ | $\Delta E_{H-L+6}$ |
|---------------|-------|-------|-------|-------|-------|------|------|----------------------|------------------|----------------------|--------------------|
| DPAOXD        | -7.98 | -6.58 | -6.45 | -0.72 | -0.01 | 0.87 | 0.87 | 6.59                 | 5.73             | 7.45                 | 7.32               |
| DPAOXDBE<br>N | -7.62 | -6.50 | -6.41 | -0.87 | -0.03 | 0.87 | 0.88 | 6.59                 | 5.54             | 7.37                 | 7.29               |

Table S8 Calculated atomic charge of different fragment in these compounds investigated.

|       | DPAOXD         |                |           | DPAOXDBEN      |                |           | BOXD- <i>p</i> -OCH <sub>3</sub> |                |           |
|-------|----------------|----------------|-----------|----------------|----------------|-----------|----------------------------------|----------------|-----------|
|       | S <sub>0</sub> | S <sub>1</sub> | variation | S <sub>0</sub> | S <sub>1</sub> | variation | S <sub>0</sub>                   | S <sub>1</sub> | variation |
| OXD   | -0.20013       | -0.36792       | -0.16779  | -0.22426       | -0.30775       | -0.08349  | -0.18928                         | -0.33248       | -0.1432   |
| c-BEN | /              | /              | /         | 0.06306        | -0.01922       | -0.08228  | /                                | /              | /         |
| BEN   | 0.05736        | 0.05304        | -0.00432  | 0.03413        | 0.04762        | 0.01349   | 0.21066                          | 0.31028        | 0.09962   |
| D     | 0.14169        | 0.31386        | 0.17217   | 0.12714        | 0.27948        | 0.15234   | -0.02124                         | 0.02236        | 0.0436    |
